# Supplementary material for: Communication Across Maternal Social Networks During England’s First National Lockdown and Its Association With Postnatal Depressive Symptoms
Source: Front Psychol. 2021 May 11;12:648002. doi: 10.3389/fpsyg.2021.648002 (PMC8144711; doi:10.3389/fpsyg.2021.648002)
Supplement: Table 2.xlsx — ‘Supplementary Material 2’ [file Table_2.xlsx]

## Sheet: Sample characteristics
Variable		Range	Mean	SD	Median	N	%
Edinburgh Postnatal Depression Scale score		0, 26	10.444	4.734	10	162	-
Age of mother (years)		19, 47	34.611	4.2	35	162	-
Number of biological children		1, 4	1.605	0.708	1	162	-
Parity	One	-	-	-	-	82	50.617
	Two	-	-	-	-	65	40.123
	Three	-	-	-	-	12	7.407
	Four	-	-	-	-	3	1.852
Age of infant (days)		2, 219	110	56.6	113.5	162
Time of birth in relation to lockdown	Before	-	-	-	-	115	70.988
	Since	-	-	-	-	47	29.012
Partnership status	Partnered	-	-	-	-	160	98.765
	Single	-	-	-	-	2	1.235
Birth complications	None	-	-	-	-	87	53.704
	Minor	-	-	-	-	56	34.568
	Major	-	-	-	-	19	11.728
Infant sex	Girl	-	-	-	-	74	45.679
	Boy	-	-	-	-	88	54.321
Financial situation worse since covid	No	-	-	-	-	115	70.988
	Yes	-	-	-	-	47	29.012
Household income before taxes	0-10k	-	-	-	-	0	0
	5,001-15k	-	-	-	-	0	0
	15,001-25k	-	-	-	-	1	0.617
	25,001-35k	-	-	-	-	2	1.235
	35,001-45k	-	-	-	-	11	6.79
	45,001-75k	-	-	-	-	41	25.309
	75,001-100k	-	-	-	-	32	19.735
	Over 100,001	-	-	-	-	56	34.568
	Don't know	-	-	-	-	4	2.469
	Prefer not to say	-	-	-	-	6	3.704
	None response	-	-	-	-	9	5.556
Socially isolating	No	-	-	-	-	141	87.037
	Yes	-	-	-	-	21	12.963
Infant's ethnicity	White	-	-	-	-	115	70.988
	South Asian/South Asian British	-	-	-	-	4	2.469
	Black/African/Caribbean/Black British	-	-	-	-	1	0.617
	East Asian/East Asian British	-	-	-	-	4	2.469
	Mixed/multiple ethnic groups	-	-	-	-	38	23.457

## Sheet: All alters models
Variables	Coef	SE	RRR	LCI	UCI
All alters - in person communication (% as exposure) n = 153
(Intercept)	2.40497	0.17161	11.0781	7.8969	15.4753
In person communication (all alters) - %	0.0018489	0.0015574	1.00185	0.998759	1.00488
Age of infant	0.0007102	0.000671	1.00071	0.999397	1.00203
Infant's ethnicity - non-white	0.0440605	0.08175	1.04505	0.888934	1.22493
Household income - over £100k	-0.0537608	0.0753066	0.947659	0.817101	1.09782
In person communication (all alters) - no.	-0.0357779	0.0148614	0.964855	0.936756	0.992967
Socially isolating - yes	0.0029739	0.113688	1.00298	0.798785	1.24786
Variance-function-based Rsq	0.120972
Variance-function-based Rsq - adjusted	0.0848477
Quasi Kullback's Information Criterion (QKIC)	424.798
All alters - in person communication (number as exposure) n = 162
(Intercept)	2.45655	0.08089	11.6644	9.94115	13.651
In person communication (all alters) - no.	-0.02633	0.01389	0.974012	0.947502	1.00053
Infant's ethnicity - non-white	0.057	0.07844	1.05866	0.906449	1.23294
Parity - two or more	-0.04413	0.07164	0.956827	0.831316	1.10099
Socially isolating - yes	-0.0441	0.11002	0.956854	0.767409	1.18177
Variance-function-based Rsq	0.0350697
Variance-function-based Rsq - adjusted	0.0104854
QKIC	446.615*
All alters - remote communication but not seen (% as exposure) n = 153
(Intercept)	2.73209	0.168148	15.365	11.0067	21.2795
Remote communication but not seen (all alters) - %	-0.0049115	0.0023528	0.995101	0.990564	0.999746
Age of infant	0.0008179	0.0006743	1.00082	0.999499	1.00215
Household income - over £100k	-0.0571422	0.0747264	0.94446	0.815272	1.09288
In person communication (all alters) - no.	-0.0512037	0.0174319	0.950085	0.91791	0.982848
Remote communication but not seen (all alters) - no.	0.0129335	0.0107532	1.01302	0.991637	1.03434
Socially isolating - yes	0.0058565	0.112197	1.00587	0.803403	1.24775
Variance-function-based Rsq	0.140296
Variance-function-based Rsq - adjusted	0.104966
QKIC	429.569
All alters - remote communication but not seen (number as exposure) n = 153
(Intercept)	2.59365	0.318831	13.3785	7.11675	24.836
Remote communication but not seen (all alters) - no.	-0.0036934	0.0075682	0.996313	0.981528	1.01109
Age of infant	0.0006114	0.0006791	1.00061	0.999282	1.00195
Age of mother	-0.001976	0.0094351	0.998026	0.979784	1.0167
Household income - over £100k	-0.0620183	0.0760489	0.939866	0.809249	1.09044
Parity - two or more	-0.0035296	0.0800079	0.996477	0.851751	1.16563
In person communication (all alters) - no.	-0.0300639	0.0145078	0.970383	0.942813	0.998003
Socially isolating - yes	-0.019221	0.112788	0.980962	0.782469	1.21808
Variance-function-based Rsq	0.113125
Variance-function-based Rsq - adjusted	0.0703101
QKIC	423.07
*QKIC not comparable as sample size differs

## Sheet: Kin models
Variables	Coef	SE	RRR	LCI	UCI
Kin - in person communication (% as exposure) n = 153
(Intercept)	2.17848	0.173417	8.83286	6.27476	12.3837
In person communication(kin) - %	0.0032274	0.001345	1.00323	1.00058	1.00587
Age of infant	0.0007117	0.0006641	1.00071	0.999413	1.00202
Infant's ethnicity - non-white	0.0665128	0.0807511	1.06877	0.910843	1.25022
Household income - over £100k	-0.0401667	0.0756992	0.960629	0.827666	1.11373
In person communication (kin) - no.	-0.0256323	0.0265544	0.974693	0.924423	1.02584
Socially isolating - yes	0.0752552	0.109927	1.07816	0.864653	1.331
Variance-function-based Rsq	0.11711
Variance-function-based Rsq - adjusted	0.0808264
QKIC	424
Kin - remote communication but not seen (% as exposure) n = 153
(Intercept)	2.55144	0.158964	12.8255	9.3716	17.4763
Remote communication but not seen (kin) - %	-0.0042671	0.0025743	0.995742	0.990756	1.00081
Age of infant	0.0006837	0.0006637	1.00068	0.999386	1.00199
Household income - over £100k	-0.0352556	0.0761637	0.965359	0.831003	1.12026
In person communication (kin) - no.	-0.0345973	0.0290894	0.965994	0.911768	1.0219
Remote communication but not seen (kin) - no.	0.0118756	0.032244	1.01195	0.948862	1.07675
Socially isolating - yes	0.0814456	0.110034	1.08485	0.869827	1.33952
Variance-function-based Rsq	0.117211
Variance-function-based Rsq - adjusted	0.0809325
QKIC	424.182

## Sheet: Post hoc models
Model	Variables	Coef	SE	RRR	LCI	UCI
All alters - %	Intercept	2.323	0.067	10.209	8.95	11.617
	In person communication - %	0.001	0.001	1.001	0.998	1.003
All alters - no.	Intercept	2.448	0.06	11.57	10.282	12.996
	In person communication - no.	-0.027	0.013	0.973	0.949	0.998
Kin - %	Intercept	2.21	0.075	9.117	7.847	10.55
	In person communication - %	0.002	0.001	1.002	1	1.005
Kin - no.	Intercept	2.339	0.063	10.373	9.161	11.728
	In person communication - no.	0.003	0.022	1.003	0.959	1.047
